# Supplementary material for: Photo-thermal effects in gold nanoparticles dispersed in thermotropic nematic liquid crystals
Source: Royal Society of Chemistry journal article supplement (doi:10.1039/c5cp01377a), 2015-01-01
Supplement: c5cp01377a1.pdf [file c5cp01377a1.pdf]

### **General protocol for seed-mediated synthesis of gold nanospheres**

The “seed mediated” method occurring in two steps: the first one involves the preparation of clusters called “seeds” (<3.5 nm) as previously reported approach.<sup>[1]</sup> It consists in reducing Au salt (5 mL of  $\text{HAuCl}_4 \cdot 3\text{H}_2\text{O}$ ,  $5 \times 10^{-4}$  M) with a strong reducing agent (0.6 mL of  $\text{NaBH}_4$ , 0.01 M), at room temperature, in the presence of an appropriate coordinating agent (5 mL of cetyltrimethylammonium bromide (CTAB), 0.2 M). Such a solution of “seeds” was kept under stirring for 2 h and then used to grow Au NPs. For this purpose,  $\text{HAuCl}_4 \cdot 3\text{H}_2\text{O}$  (0.024 M) was dissolved in 3 mL of cetyltrimethylammonium chloride (CTAC) solution (0.08 M), and then reduced by ascorbic acid (ascorbic acid/ $\text{Au}^{3+} = 2$ ). As the solution became colourless, a suitable amount of seed solution was added. Then, the solution turned from white to bright red, thus suggesting the formation of spherical particles ( $8 \times 10^{-8}$  M). The sample were purified by the excess of free surfactant by centrifugation at 8000 rpm for 20 min at  $T = 25^\circ\text{C}$ . The as prepared sample was characterized from a spectroscopic and morphological point of view. The CTAC-capped GNPs have been extracted in the  $\text{CHCl}_3$  with decanoic acid by slightly modifying the Jana’s protocol.<sup>[2]</sup> 100 mg of solid decanoic acid were added to 1 mL of the NP solution and sonicated for 5÷10 min, then 1 mL of neat chloroform were added to such GNPs solution. Finally, 1 mL of carbonate buffer (pH=9,6) has been added and the mixture was shaken. All the GNPs have been successfully extracted transferred in chloroform.

### **Thermal characterization of the nematic to isotropic transition of samples**

We have performed a control experiment by measuring the transmittance (CW probe laser, emitting at  $\lambda = 633\text{nm}$ ) of both pure NLC and NLC/GNPs samples (placed between crossed polarizers with the optical axis of the sample set at  $45^\circ$  with respect to the polarizer/analyzer axes) versus the external temperature. The temperature is controlled by a hot-stage; this is also

used to slowly cool down (0.2 °C/min) the samples to room temperature by means of a controlled ramp, once the isotropic phase transition has been reached.

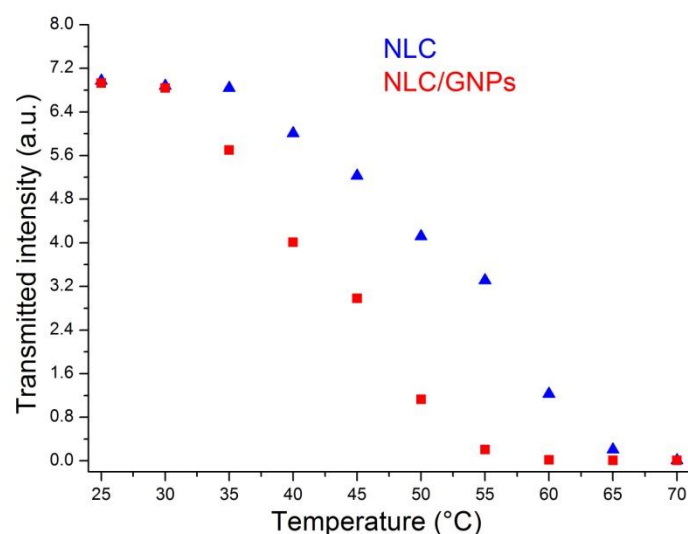

**Figure S1:** Transmitted intensity versus temperature for both NLC (blue triangle) and NLC/GNPs (red square) samples..

As a result, in both cases, the transmitted intensity exhibits a variation from a maximum to a minimum without any oscillating behavior. The pure NLC sample exhibits a nematic to isotropic transition temperature of about 65°C, while, in the mixed NLC/GNPs sample, the presence of GNPs acts as a destabilizer for the NLC component, lowering its transition temperature by about 10°C (55°C instead of 65°C).

## References

- [1] B. Nikoobakht, M. A. El-Sayed, *Chem. Mater.* **2003**, 15, 1957.
- [2] N. R. Jana, *Small* **2005**, 1, 875.
